# Supplementary material for: Satellite Altimetry-based Extension of global-scale in situ river discharge Measurements (SAEM)
Source: Copernicus journal article supplement (doi:10.5194/essd-2024-406), 2024-09-25
Supplement: Supplementary file [file essd-2024-406-AC2-supplement.pdf]

**RC1: 'Comment on essd-2024-406', Dr. Adrien Paris**

Please find here after my comment on essd-2024-406 manuscript. Overall, the manuscript is well written and easy to read. The dataset presented here will be useful for a large panel of users and my recommendation would be that the manuscript is accepted after revisions.

Some questions remain regarding the possible discrepancies within the dataset not being acknowledged (intermission biases, local differences due to geoid, retracking methods) in this version, regarding the way uncertainties are taken into consideration and regarding some methodological choices. The results also should be further criticized on the light of the input data, given that they may depend on the validation method and/or validation data availability.

Hereafter are my main remarks with the corresponding lines in the initial version.

Kind regards.

Dear Dr. Paris,

Thank you for taking the time to review our manuscript and for your constructive feedback. We greatly appreciate your recognition of the manuscript's clarity and the potential usefulness of the dataset for a wide range of users.

We have carefully addressed each of your points (inter-mission biases, uncertainties, methodological choices, and the need for a more critical discussion of the results in light of the input data) in the revised manuscript and hope that the changes align with your suggestions.

In the following, you can find our detailed responses to your comments.

Thank you once again for your valuable insights and kind recommendation.

Kind regards,

Peyman Saemian on behalf of all the co-authors

### Section 2.3.1

I miss a § at the end of 2.3.1 stating the differences of the aforementioned databases (open accessibility or not, timeliness, NRT availability or not, etc.), so that the reader understands why several databases were used; This could be done extending Table 2.

Has any inter-validation been performed when/where overlaps (in VSs) were found? Are there any in the literature? In this section, the reader should understand what were the choices made in case of overlap and why such choices were made. This is crucial for people that would like to duplicate / extend the dataset.

Thank you for your comment. The main reason for using various databases was to benefit from all publicly available Level-3 products and reduce the load for generating new time series which could be a huge task given the considerable number of virtual stations (VSs) in this study. Regarding accessibility, all databases used are publicly available or upon request. In terms of near-real-time (NRT) data, Hydroweb.Next offers NRT data. For overlaps in VSs between databases, we retained all and included the information in the VS catalog for transparency. For the final discharge estimates, we selected the product that passed our quality control and had the better KGE value.

We added the following text to the revised manuscript and the end of section 2.3.1:

*“The primary aim of using these databases is to benefit from the already available Level-3 products and reduce the computational load of processing water level (WL) time series for virtual stations (VSs). In SAEM, we directly utilize the quality-controlled WL time series provided by these databases without any reprocessing or post-processing. Regarding accessibility, all databases are publicly available or upon request. In terms of near-real-time (NRT) data, Hydroweb.Next offers NRT data. When overlaps in VSs were identified between databases, we retained all products in the VS catalog for transparency. The product that passed quality control and achieved better statistical metrics was selected for the final discharge estimates.”*

#### Section 2.3.1 §1 Hydroweb.next

- Please check the satellites list (L97-98) which were used to produce Hwb-Next time series of rivers WL;

Thank you for bringing this to our attention. We have reviewed and revised the list of satellites in the revised manuscript.

- The data sources (L99,100) and the reference apply for lakes and not rivers; For rivers, please cite Santos da Silva J., S. Calmant, O. Rotuono Filho, F. Seyler, G. Cochonneau, E. Roux, J. W. Mansour, Water Levels in the Amazon basin derived from the ERS-2 and ENVISAT Radar Altimetry Missions, Remote Sensing of the Environment, 2010, doi:10.1016/j.rse.2010.04.020

Thank you for pointing this out. We have revised the manuscript to replace the reference with the appropriate citation for rivers, i.e., Santos da Silva et al. (2010).

### Section 3.1 Construction of VS catalog

- L138-139: please specify the dams and reservoirs database used in input

We have used the reach-wise flag of dams and reservoirs from the SWORD dataset to identify the presence of dams and reservoirs along river reaches.

The following sentence is added to the revised version:

*“The presence of dams and reservoirs was determined based on the reach-wise flags provided in the SWORD v16 dataset.”*

- Specify that SWORD V16 (from Fig. 3) was used. Is it version dependent, or did you created a customized one, possibly with connectivity issues corrected? Will the code for creating this VS catalog with connectivity and hydrological constraints be made available to the community together with the database?

Thank you for your comment. We have added the SWORD version (v16) to the caption of Figure 3 and mentioned it in the manuscript (e.g., sub-section 2.1 and sub-section 3.1). The results of SAEM are dependent on SWORD v16 for this version. Connectivity issues in SWORD are minimized by excluding gauges on narrow rivers ( $Q < 10$  m<sup>3</sup>/s) in this dataset. Future versions or improved SWORD datasets could further reduce missed VSs or gauges. Regarding the code, we do not plan to make it publicly available at this stage. We appreciate your understanding.

- L142-143: put the ENVISAT series list in chronological order

Thank you for pointing this out. We have corrected the mission list to reflect the chronological order: ERS1, ERS2, Envisat, Envisat Extended, and Saral/AltiKa.

### Section 3.2 WL time series

- Since SAEM includes L3 WL time series, I consider a dedicated paragraph on inter-mission biases is mandatory. Even though discharges are estimated through mono-mission non parametric curves, such biases shall be taken in consideration by whoever want to use the L3 WL TS from this database or any other all together to build long TS. Moreover since different retracers are used among the missions.

Thank you for raising this important point. As you correctly mentioned, inter-mission biases are not directly relevant to the discharge estimates provided in SAEM. At the same time, we agree that discussing these biases is essential to ensure that users are aware of their implications. Additionally, we emphasize that users should be cautious when using the rating curves provided, as they are specific to the retracers and setups used in the L3 databases or SAEM WL. We have added the following paragraph in the revised manuscript section 4.2 to address these issues:

*“Although SAEM provides mono-mission discharge estimates using non-parametric rating curves, it is important to acknowledge inter-mission biases that may arise when comparing or combining water*

*level time series (WL TS) from different satellite missions. Such biases, resulting from differences in satellite orbits, calibration, and instrument characteristics, can impact the continuity and consistency of long-term WL TS. Additionally, the use of different retrackers can also introduce biases. In SAEM, the water level time series are specific to the retrackers and processing setups used for each mission. Users who aim to build long-term WL TS by combining Level-3 data from multiple missions should account for these biases to ensure meaningful comparisons.”*

- L152-153: this masking choice implies, for past missions, to keep a very low number of "Hi" measurements from your raw altimetric data. For small rivers, this would mean keeping only the one measurement geolocated over the water. What are your statistics on this point (percentage of dates with <2 H<sub>i</sub> measurements for example), and do this have an influence on the final median that you process (and which uncertainty do you provide in this case)? I believe this should be further explained.

Thank you for your comment. We have reviewed our data processing to address your concerns. Our analysis indicates that epochs with fewer than two valid "Hi" measurements occur in only 0.6% of the total data epochs, which is consistent across orbit families: approximately 0.2% in the Envisat series, 0.8% in the Topex/Jason series, 0.2% in Sentinel-3A, and only one case in Sentinel-3B. Figure R1 demonstrates the number of dates with only one valid measurement relative to the mean discharge of the gauges, shown in total and for each orbit family separately. As expected, these cases are more frequent in narrower rivers but remain insignificant in terms of the total number of epochs.

For epochs with only one valid "Hi" measurement, we retain the measurement as it represents an aggregated value derived from multiple echoes. With the 75% water occurrence threshold applied, the level of noise is significantly reduced, and we consider the resulting water level estimate reliable. We have added the following explanation to the revised manuscript for clarity:

*“The use of the GSW mask helps maintain the quality of the extracted time series by excluding non-water reflections. Cases with fewer than two valid measurements per epoch are rare (0.6% of all data epochs) and are retained.”*

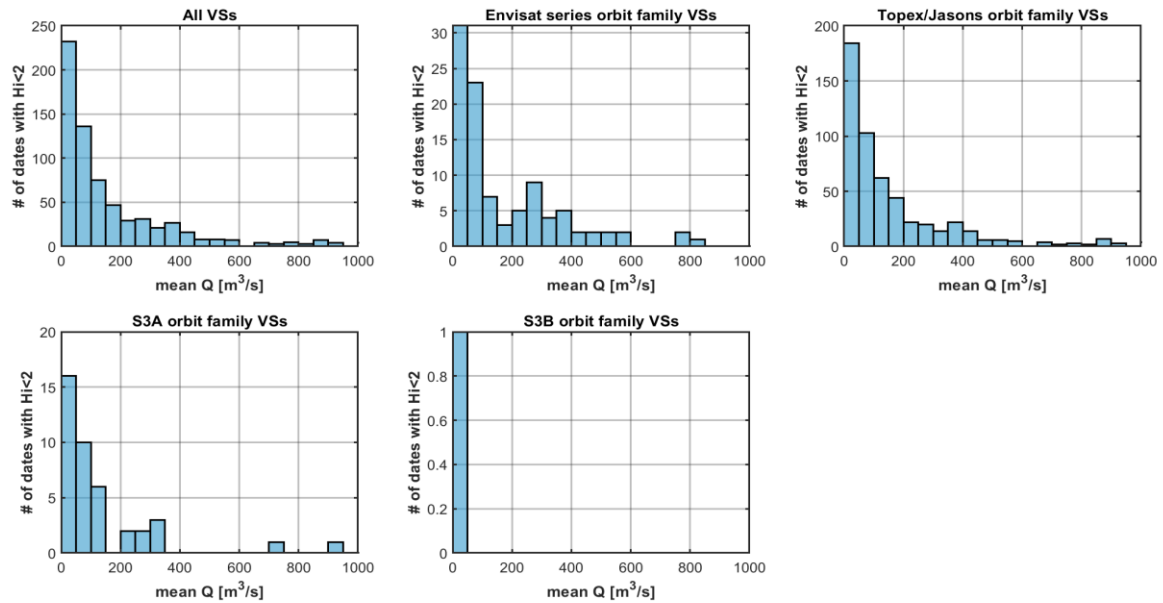

Fig R. 1. Number of dates with only one measurement relative to the mean discharge of the gauges, shown in all VSs and for each orbit family separately.

- L171: Is XGM2019 used in one of the L3 databases used in this study? Differences between gravity field models can lead to lat/lon dependent biases between the series from external databases (e.g. Hydroweb.next) that are on EGM2008 and the L3 processed time series. In a matter of uniformity, using the same GGM would be recommendable.

We selected the XGM2019e model because it performs better in regions with limited in-situ gravity data, as demonstrated by Zingerle et al. (2020). Since Dahiti and Hydroweb.Next already use different geoid models, achieving uniformity across databases is not feasible. However, since all these global models are freely available, users can easily retrieve geoid heights for their preferred model using lat/lon coordinates and adjust the orthometric height accordingly. We have included the following explanation in the revised manuscript to clarify the reasoning behind the choice of the geoid model:

“The geoid height  $N$  is determined using static gravity field models, specifically referencing XGM2019e (Pail et al., 2018), which has been shown to perform better in regions with limited in-situ gravity data (Zingerle et al. 2020). Achieving uniformity across databases is not feasible, as different Level-3 water level databases, such as Dahiti and Hydroweb.Next, already use different geoid models. However, since all these global models are freely available, users can retrieve geoid heights for their preferred model using lat/lon coordinates and adjust the orthometric height accordingly.”

Zingerle, P., Pail, R., Gruber, T., & Oikonomidou, X. (2020). The combined global gravity field model XGM2019e. *Journal of geodesy*, 94(7), 66.

- L180-184: it would be worth having a table with those statistics. I.e. how many TS were generated, how many (in %?) passed the QC check (total and by mission), and why.

Thank you for your comment. We agree that including statistics in the text will enhance clarity and provide a better understanding of the quality control process. To be transparent, it is challenging to trace back the specific reasons behind each rejection, as our code evaluates multiple criteria and automatically flags time series for rejection or acceptance. We have revised the manuscript to incorporate more details directly into the text (sub-section 3.2):

*“In total, 3763 WL time series were generated for 1702 gauges across various orbit families, including 1598 from the Envisat orbit family, 990 from the Topex/Jason orbit family, 561 from Sentinel-3A, and 614 from Sentinel-3B. During the quality control process, 632 WL time series were rejected, representing approximately 17% of the total. Rejection rates varied across orbit families, with 494 WL time series rejected from the Envisat orbit family, 34 from Topex/Jason, 64 from Sentinel-3A, and 40 from Sentinel-3B.”*

### 3.3 Non parametric rating curve

- L187-193: I suggest discriminating the advantages as a function of the approach. Indeed,

Thank you for your comment. We have updated the list to clarify how our algorithm addresses the mentioned limitations. Below is the modified version of the statements in lines 191-193.

- the "does not necessitate simultaneous ..." is not due to the non-parametric and could be also the case for linear regression;

*“it does not require simultaneous gauge-based and space-based measurements, since the algorithm determines the water height-discharge model by matching the quantile functions,”*

- "it assumes no specific predefined ..." is only for the non-parametric, and it should be stated why this is an advantage comparing to other formulations;

*“it follows a data-driven, nonparametric approach rather than relying on predefined linear or power-law relationships to minimize the possibility of mismodeling,”*

- realistic uncertainty: is not dependent on the formulation but comes from the MC simulations and the creation of a stack of WL and Q.

The methodology paper by Elmi et al. (2021) extensively discusses the discharge uncertainty estimates using this method. In this context, "realistic uncertainty" refers to the discharge uncertainty estimates for each discharge percentile caused only by the uncertainty of the input data. So, it is somehow related to the nonparametric nature of the algorithm. The text in the paper will be modified as follows:

*“it provides input-driven discharge uncertainty estimates for each discharge percentile separately rather than relying only on a variance-covariance matrix for model parameters.”*

Elmi, O., Tourian, M. J., Bárdossy, A., & Sneeuw, N. (2021). Spaceborne river discharge from a nonparametric stochastic quantile mapping function. *Water Resources Research*, 57(12), e2021WR030277.

- L206-208: This means that the uncertainty raised from previous steps is not being used. Why this choice? The “10% multiplicative uncertainty” should be better explained. Also, a sensitivity analysis of the MC algorithm to the uncertainty (and consequently, the sensitivity of the non-parametric RCs derived) shall be investigated (testing different bounds for uncertainty, and even informative uncertainty such as the one coming from WL processing).

The 10% multiplicative uncertainty is only applied in the first iteration as an initial value because no reliable uncertainty estimates exist for gauge discharge. We chose not to use the uncertainties provided with the altimetric water levels, as these uncertainties differ in definition across data centers, making their integration inconsistent. After the first iteration, the algorithm re-calibrates the input data uncertainties based on the model’s performance evaluation. This iteration process continues until the algorithm meets the convergence criteria. We have updated the manuscript to better explain this choice and clarify the 10% multiplicative uncertainty:

*“In the initial iteration, the algorithm considers a multiplicative uncertainty of 10% of the signal for the input time series. This decision is due to the lack of available uncertainty estimates for the gauge discharge dataset and the inconsistent definitions of uncertainties across altimetric water level databases. As the algorithm progresses, it refines its estimates by updating the measurement uncertainties at each iteration. This iterative process continues until the termination condition is met; however, a maximum number of iterations is also set to ensure the algorithm converges within a predefined limit.”*

- L208: Convergence of MC algorithms is an important point. What convergence criteria was considered, and did all the Q/H Ts reached convergence? If not, how many did not pass, and on which reaches, rivers, etc?

We use a maximum iteration criterion to ensure the Monte Carlo (MC) algorithms converges within a predefined limit (add to the revised text for clarity). Additionally, our quality control steps are designed to mitigate problematic cases where convergence may not be achieved. While this is an important topic, a detailed investigation of non-converging cases is beyond the scope of this study and can be explored further in future work.

## 5 Results

- L275-279: A statistics on the step where data was rejected could be very important: was it due to a lack of raw (gdr) data, during the WL processing, during the NPQM, quality test? etc. The visualization could be done maybe with a geographical (lat/lon) view?

Thank you for your comment. We have added detailed statistics in the revised manuscript to provide insight into the rejection process at each step. After applying the mean discharge threshold of greater than 10 m<sup>3</sup>/s, the number of gauges considered decreased from approximately 47,000 to 15,040.

Among these, 8,730 gauges are included in SAEM v1.0. For the 6,310 gauges not included in SAEM, only 1,405 were within 12 km of a SWORD reach, with the remaining gauges being rejected due to greater distances. Of the 1,405 gauges near SWORD reaches, 671 had water level (WL) data either from Level-3 databases or SAEM WL. For these gauges, the Non-Parametric Quantile Mapping (NPQM) method failed to converge for any orbit family in 69 cases, while it successfully converged for at least one orbit family in 602 cases. Of the 602 cases ultimately rejected, 263 were excluded after visual inspection, and 339 were rejected due to failing statistical thresholds. We added this information to the revised manuscript.

- L300: remove the “exceptionally”. The model performs indeed well in these regions, yet KGE and Corr remain in the “good” domain and not in the “exceptional”  
Done!
- L305: “the overall good accuracy” instead of “high accuracy”, for the same reasons than above  
Done
- L306: is 73% the right value? Please check, this seems pretty high to me.

Thank you for catching this error. You are correct, and the correct value is 18%. We have revised the manuscript to reflect this correction at Line 306.

- L310-311: I am quite surprised by the low values show by S3B (same as T/P Jason). It is important to bring some elements of explanation in the discussion section, since S3B is expected to perform at least as good as S3A, at least in terms of WL estimates. What can explain such difference? The length of the TS? The lack of in situ data for validation on the recent period? Anythink else? Please discuss it. Regarding Topex/Jason also, are all the missions giving similar results? Or is the global quality impacted by the oldest missions? When ENVISAT is mentioned, is it only ENVISAT or is it the family (ERS/ENV/SRL)?

Thank you for your comment. As you correctly mentioned, several factors contribute to the observed differences in performance between Sentinel-3A (S3A) and Sentinel-3B (S3B). One primary reason is the length of the water level time series, with S3A operational since 2016 and S3B since 2018, resulting in a shorter data record for S3B. Additionally, there are more cases with simultaneous water level and discharge data for S3A (4483 out of a total of 8928 cases) compared to S3B (2369 out of 4791 cases). The cumulative distribution function (CDF) plots in Figure A2 shows performance based only on simultaneous cases, which are nearly double for S3A, influencing the comparison. Furthermore, the different orbits of S3A and S3B could also play a role in their performance.

Regarding the Topex/Jason orbit family, the global quality is likely impacted by the older missions, as these missions span multiple generations with differing sensor capabilities and retracking algorithms. Finally, when referring to Envisat in the manuscript, we mean the Envisat orbit family, which includes data from ERS, Envisat, and Saral/AltiKa.

We have revised the manuscript to include these considerations and provide further discussion:

*“The difference in performance between Sentinel-3A and Sentinel-3B is influenced by several factors. Besides the difference in their orbit, Sentinel-3A has been operational since 2016, providing a longer*



*data record compared to Sentinel-3B, which began in 2018. Additionally, there are significantly more cases with simultaneous water level and discharge data for Sentinel-3A compared to Sentinel-3B (4483 vs 2369). For the Topex/Jason orbit family, the global quality is influenced by the older missions, which may exhibit higher uncertainty due to differing sensor capabilities and retracking algorithms.”*

- L345-348: provide other metrics to complement KGE (KGE improvement of 0.15 is somehow uneasy to quantify) (e.g. NRMSE in %, other)

Thank you for the suggestion. We have added the values of the correlation coefficient and NRMSE (in %) to the revised manuscript.

- L361: CCI WL rely mostly on hand-processed time series using Altis software (and in particular it is the case for Niger TSs, please correct.

Thank you for pointing this out. We corrected the text in the revised manuscript.

- Figure 10: I would rather show the comparison in terms of anomaly (or also show), in order to better evidence differences between SAEM and CCI for all the discharge amplitude (can be anomaly or normalized anomaly). Differences for small discharges do not appear clearly here. Same for WL.

Following your recommendation, we have revised Figure 10 to include the differences between SAEM discharge and CCI discharge, color-coded by different orbit families. This representation better highlights the differences across the entire discharge amplitude range, including for smaller discharges. Additionally, we have incorporated the SAEM rating curves along with their corresponding uncertainties. The revised figure shows that the parametric approach used in CCI generally lies within the uncertainty range of SAEM, except for the middle range of quantiles. This difference is explainable, as the non-parametric approach in SAEM is designed to closely follow the behavior of the data, while the parametric approach in CCI maintains a power-law relationship across the entire range of quantiles. We have updated the manuscript and figure accordingly to reflect these changes.

### 5.3 Discussion

- I miss a paragraph dedicated to the discussion around uncertainties. For example, does the CCI RC fall inside the uncertainty bound for SAEM RCs? What is the contribution of providing uncertainty in discharge estimate. Does this uncertainty is useful, and in line with other (e.g. CCI) provided uncertainties?

Thank you for your comment. The NPQM method used in our study has been thoroughly presented and discussed in our previous works:

<https://www.nature.com/articles/s41597-024-03078-6>

<https://agupubs.onlinelibrary.wiley.com/doi/full/10.1029/2021WR030277>

so we did not revisit it in detail in this manuscript. However, based on your suggestion, we have added a brief mention of uncertainties at the end of the methods section to ensure clarity for readers.

Additionally, we have included the uncertainty values for the rating curves in Figure 10 to enable a comparison of the rating curves (RC) from CCI and SAEM, which is already mentioned and discussed in the previous comment.

- L420-425: This matter is worth discussing a little more. See Kirchner 2006 "getting the right answers", the choice of non-parametric vs parametric RCs can be discussed here, bringing together the advantages (as already shown) but also the drawbacks of both methods (hydraulic-based vs data-fit based)

Thank you for the suggestion and for referencing Kirchner (2006). We agree that a discussion on the advantages and drawbacks of parametric (hydraulic-based) and non-parametric (data-fit based) methods is valuable. We have included the following text to the revised text to include this discussion:

*“While the non-parametric method for discharge estimation faces challenges related to stationarity, it offers a useful alternative to traditional parametric rating curve models. Parametric models, which are grounded in hydraulic principles, often rely on predefined functional forms. While this ensures physical interpretability, such models may underfit when these functional forms fail to capture the inherent variability and complexity of river channels (Elmi et al., 2021, kirchner 2006). In an ideal scenario, modeling such behavior would require a full-dimensional process representation based on a comprehensive understanding of the processes, their heterogeneity, and their spatio-temporal dependencies. However, this is rarely feasible in practice, and missing dimensions or physics often lead to mismodeling that propagates and reduces the accuracy of parametric approaches for obtaining rating curves (Gharari and Razavi, 2018). In contrast, the non-parametric method used in this study offers greater flexibility by allowing the data itself to define the relationship between water levels and discharge. This adaptability can result in more accurate and reliable estimations, particularly in capturing localized and complex dynamics (Elmi et al., 2021). However, non-parametric methods are not without limitations. They can be prone to overfitting, especially in the presence of localized anomalies or when working with low-quality input data.”*

Gharari, S., & Razavi, S. (2018). A review and synthesis of hysteresis in hydrology and hydrological modeling: Memory, path-dependency, or missing physics?. *Journal of hydrology*, 566, 500-519.

- As said above, the relative performance of SAEM discharges as a function of the mission should be discussed, since the classical “quality evolution” with time is not respected here. This can be due to several aspects, which need to be discussed so that the reader/user understand what lies in this validation statistics.

As it is already mentioned in the previous comments, we have revised the text to include a detailed comparison of the performance of SAEM discharge estimates across different orbit families. The revised manuscript also discusses the possible reasons behind the observed performance variations, providing readers and users with a clearer understanding of the validation statistics.
